# Supplementary material for: A General Definition and Nomenclature for Alternative Splicing Events
Source: PLOS journal article supplement (doi:10.1371/journal.pcbi.1000147), 2008-08-07

### A VEGFA, 6<sup>th</sup> intron

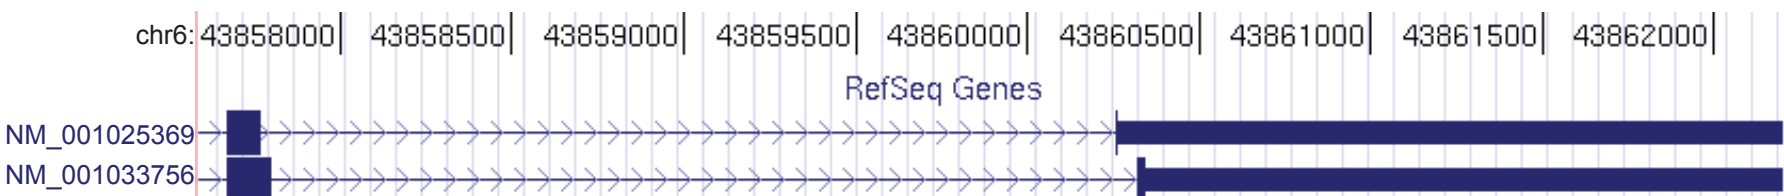

### B CLEC10A, 6<sup>th</sup> exon

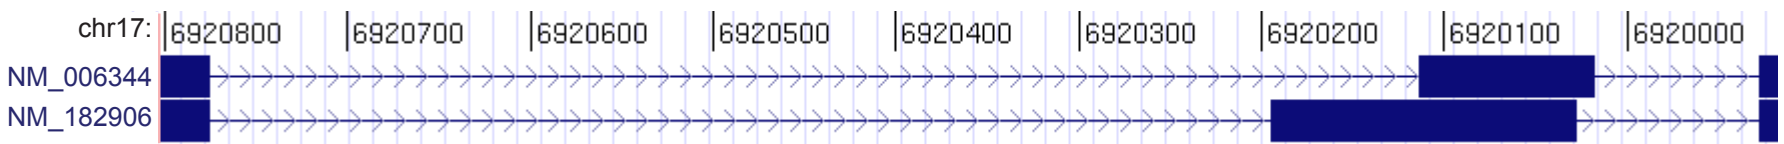

### C TCL6, 1<sup>st</sup>/4<sup>th</sup> intron

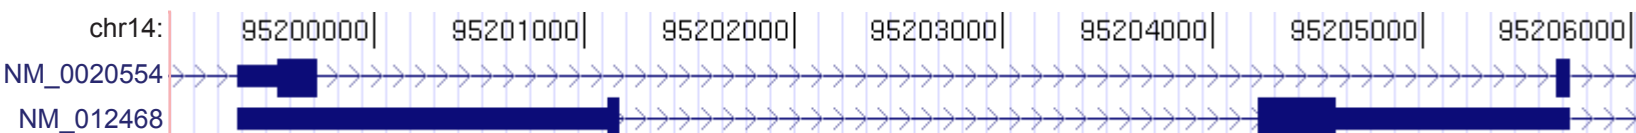

### D AURKC, 1<sup>st</sup> exon

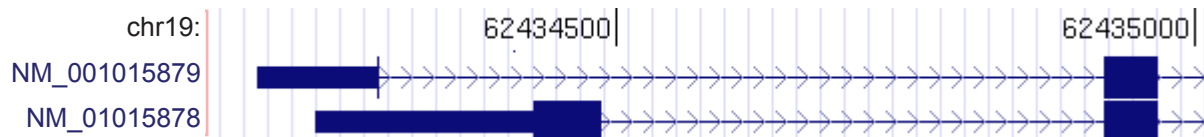

### E AIF1, 3<sup>rd</sup> exon ff.

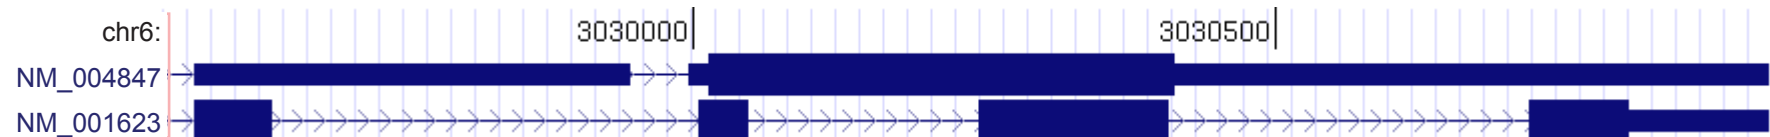

Supplement: S4 (10.1371/journal.pcbi.1000147.s004) [file journal.pcbi.1000147.s004]
